# Supplementary material for: Serotonin receptor 1A–modulated phosphorylation of glycine receptor α3 controls breathing in mice
Source: JCI journal article supplement (doi:10.1172/jci43029), 2010-11-01
Supplement: sd1 [file 1]

Figure S1

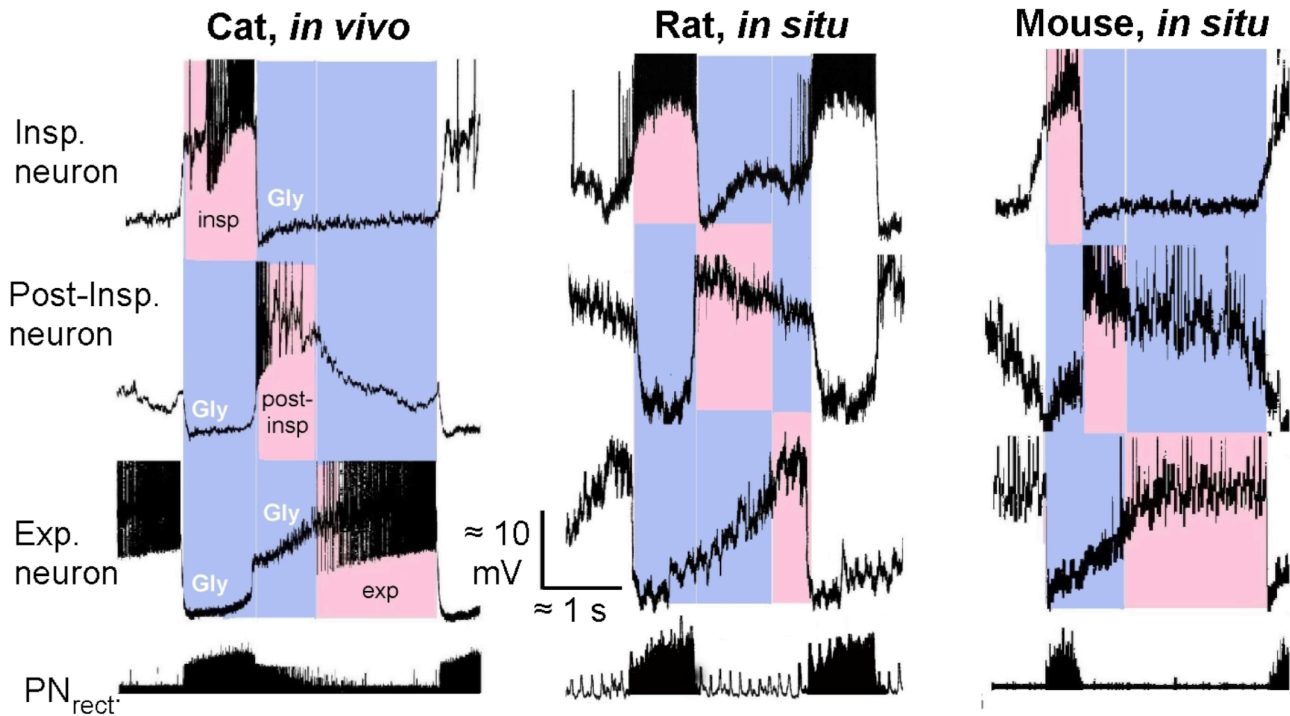

**A three phased respiratory rhythm that is characteristic for eupneic breathing of *in vivo* mammals resulting from an antagonistic organization of the respiratory network**

Under *in vivo* and *in vivo-like* conditions, the rhythmic activity of the respiratory network operates in a comparable way in a variety of mammalian animal species as illustrated for the cat, rat, and mouse. Not shown are similar recordings from the piglet. The functional role is to control inspiratory muscle contractions (via the phrenic nerve PN) controlling lung inflation, followed by a slow relaxation of inspiratory muscle contractions (post-inspiration) and finally expiratory muscle contractions. At the level of specific classes of inspiratory, post-inspiratory, and expiratory neurons in the brainstem, characteristic membrane potential oscillations originate from a sequential volley of excitatory synaptic and inhibitory synaptic inputs. Whenever one class of neurons becomes active (pink periods), antagonistic neurons are inhibited (grey areas). Such rhythmic oscillations of membrane potential reveal a clear separation between inspiratory, post-inspiratory, and expiratory phases of an oscillatory cycle. Such organization seems characteristic for breathing movements of all *in vivo* mammals.

Figure S2

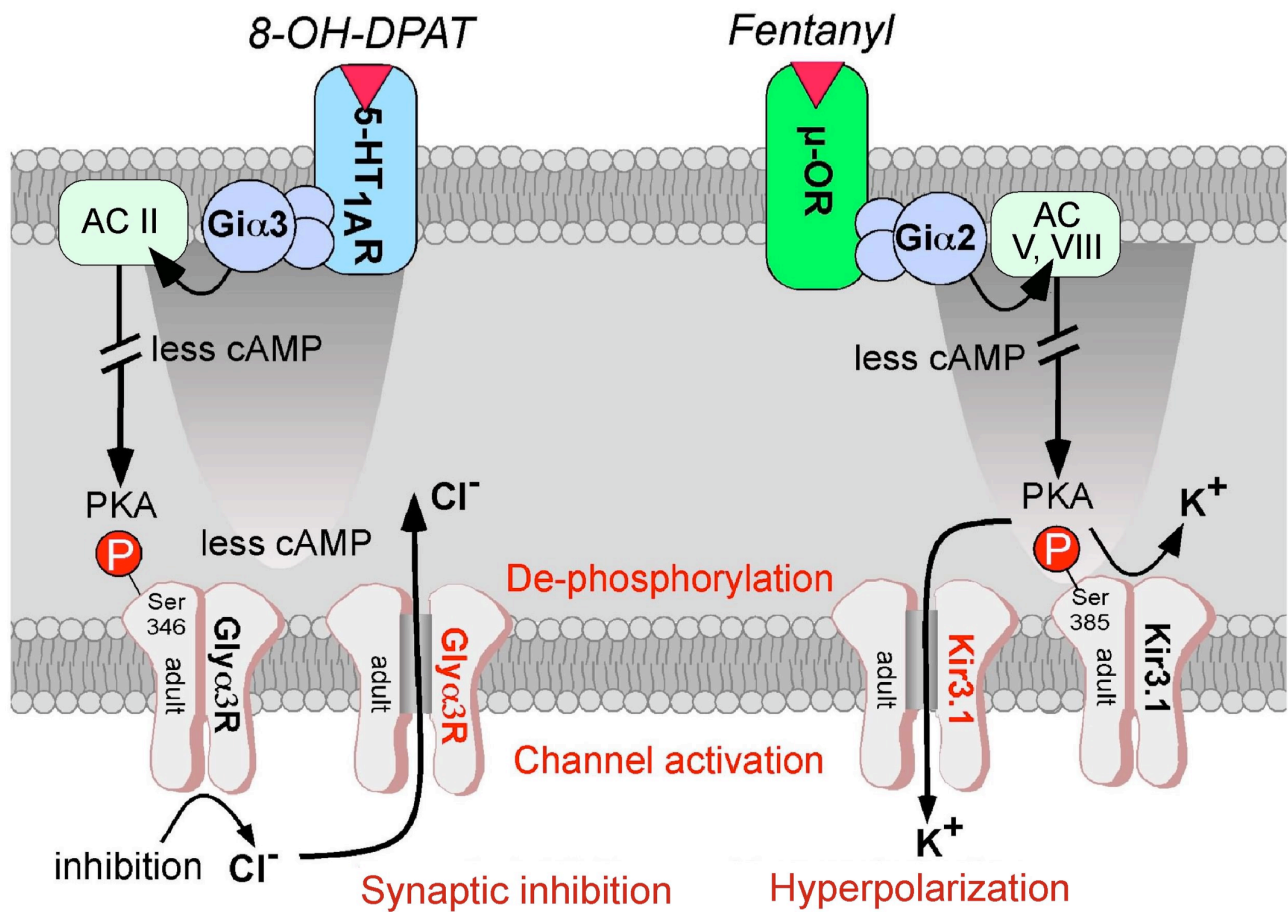

**Schematic illustration of the presumed signaling pathways activated by 5-HTR<sub>1A</sub> and μOR**

It is known that 5-HTR<sub>1A</sub> and μOR act via different G<sub>αi</sub> proteins, 5-HTR<sub>1A</sub> through G<sub>αi3</sub> (1) and μOR through G<sub>αi2</sub> (2) to inhibit different types of adenylyl cyclases, presumably AC-II (3) and AC-V (4) or AC-VIII (5), respectively. This divergence of the signaling pathways block PKA-mediated phosphorylation of GlyRα<sub>3</sub> or K<sup>+</sup> channels to increase their conductance. As a consequence, activation of 5-HTR<sub>1A</sub> induces reinforcement of cyclic glycinergic inhibition, while μOR provokes persistent membrane hyperpolarization.

1. Renner U *et al.* Localization of the mouse 5-hydroxytryptamine(1A) receptor in lipid microdomains depends on its palmitoylation and is involved in receptor-mediated signaling. *Mol Pharmacol.* 2007; 72: 502-513
2. Zhang L, Zhao H, Qiu Y, Loh HH, Law PY. Src phosphorylation of micro-receptor is responsible for the receptor switching from an inhibitory to a stimulatory signal. *J Biol Chem.* 2009; 284: 1990-2000
3. Liu YF, Ghahremani MH, Rasenick MM, Jakobs KH, Albert PR. Stimulation of cAMP synthesis by Gi-coupled receptors upon ablation of distinct Galphai protein expression. Gi subtype specificity of the 5-HT<sub>1A</sub> receptor. *J Biol Chem.* 1999; 274: 16444-50
4. Kim KS, Lee KW, Lee KW, Im JY, Yoo JY, Kim SW, Lee JK, Nestler EJ, Han PL. Adenylyl cyclase type 5 (AC5) is an essential mediator of morphine action. *Proc Natl Acad Sci U S A.* 2006; 103: 3908-13
5. Steiner D, Avidor-Reiss T, Schallmach E, Butovsky E, Lev N, Vogel Z. Regulation of adenylyl cyclase type VIII splice variants by acute and chronic Gi/o-coupled receptor activation. *Biochem J.* 2005; 386: 341-8
